# Supplementary material for: Integrative cross-omics and cross-context analysis elucidates molecular links underlying genetic effects on complex traits
Source: Springer Nature journal article supplement (doi:10.1038/s41467-024-46675-0), 2024-03-16
Supplement: MOESM3 [file 41467_2024_46675_MOESM3_ESM.pdf › 41467_2024_46675_MOESM3_ESM.pdf]

## **Description of Additional Supplementary Files**

File Name: Supplementary Data 1-3

Description: Supplementary Data 1-3 are included. Supplementary Data 1 is the list of diseases and traits used in the analysis. Supplementary Data 2 shows the laminar-specific expression of genes associated with risk loci of SCZ. Supplementary Data 3 shows genes that have laminar-specific expression and are associated with risk loci of ASD.
