# Supplementary material for: Integrative cross-omics and cross-context analysis elucidates molecular links underlying genetic effects on complex traits
Source: Nat Commun. 2024 Mar 16;15:2383. doi: 10.1038/s41467-024-46675-0 (PMC10944527; doi:10.1038/s41467-024-46675-0)
Supplement: Supplementary file 4 — Supplementary Data 1-3 [file 41467_2024_46675_MOESM4_ESM.xlsx]

## Sheet: Data 1 - Traits and diseases
Supplementary Data 1. List of the traits and diseases analyzed in trans-e/mQTL analysis.
Name	Number of risk loci	Disease/Trait
Type 2 diabetes	2382	Disease
Schizophrenia	1023	Disease
Asthma	880	Disease
Adolescent idiopathic scoliosis	873	Disease
Coronary artery disease	864	Disease
Prostate cancer	810	Disease
Breast cancer	668	Disease
Systemic lupus erythematosus	549	Disease
Rheumatoid arthritis	480	Disease
Crohn's disease	421	Disease
Atrial fibrillation	419	Disease
Psoriasis	415	Disease
Inflammatory bowel disease	408	Disease
Insomnia	373	Disease
Depressive symptoms	311	Disease
Colorectal cancer	288	Disease
Cardiovascular disease	278	Disease
Ulcerative colitis	256	Disease
Type 1 diabetes	250	Disease
Depression	209	Disease
Basal cell carcinoma	195	Disease
Atopic asthma	192	Disease
Eczema	192	Disease
Alzheimer's disease or family history of Alzheimer's disease	191	Disease
Parkinson's disease	170	Disease
Hypertension	165	Disease
Chronic obstructive pulmonary disease	155	Disease
Venous thromboembolism	148	Disease
Hay fever and or eczema	148	Disease
Depressed affect	143	Disease
Autism spectrum disorder or schizophrenia	139	Disease
Alzheimer's disease	125	Disease
Celiac disease	124	Disease
Uterine fibroids	112	Disease
Platelet count	2222	Trait
Low density lipoprotein cholesterol levels	1542	Trait
Lymphocyte counts	1534	Trait
Neutrophil count	1302	Trait
Educational attainment	1287	Trait
Sex hormone-binding globulin levels	1186	Trait
Serum metabolite levels	1110	Trait
Male-pattern baldness	1078	Trait
C-reactive protein levels	1044	Trait
Neuroticism	948	Trait
Pulse pressure	922	Trait
Brain region volumes	869	Trait
Triglycerides	820	Trait
Monocyte percentage of white cells	713	Trait
High light scatter reticulocyte count	706	Trait
Reticulocyte fraction of red cells	683	Trait
Mean reticulocyte volume	569	Trait
Aspartate aminotransferase levels	560	Trait
Intelligence	531	Trait
Menarche age at onset	513	Trait
Self-reported math ability	498	Trait
Refractive error	454	Trait
Chronotype	428	Trait
White matter microstructure (mean diusivities)	381	Trait
Morning person	350	Trait
Birth weight	339	Trait
Highest math class taken	303	Trait
General risk tolerance	296	Trait
General factor of neuroticism	282	Trait
White matter microstructure (fractional anisotropy)	277	Trait
Calcium levels	232	Trait
Cognitive performance	203	Trait
White matter microstructure (axial diusivities)	182	Trait
Mean arterial pressure	176	Trait
Neurociticism	171	Trait
Sum eosinophil basophil counts	170	Trait
Adventurousness	161	Trait
Cortical surface area (MOSTest)	132	Trait
Myeloid white cell count	130	Trait
Sleep duration	125	Trait
Granulocyte count	122	Trait
Sum basophil neutrophil counts	120	Trait
Testosterone levels	117	Trait
Leisure sedentary behaviour (television watching)	117	Trait
Resting heart rate	105	Trait
Risk-taking tendency	100	Trait

## Sheet: Data 2 - SCZ genes
Supplementary Data 2. Layer-specific differential expression of genes associated with the risk loci of SCZ
Gene ID	Gene symbol	Layer with layer-specific expression
ENSG00000204396	VWA7	Layer 2	Layer 5	White matter
ENSG00000204421	LY6G6C	Layer 2	Layer 5	White matter
ENSG00000028116	VRK2	Layer 2	Layer 5	White matter
ENSG00000059915	PSD	Layer 2	Layer 5	White matter
ENSG00000103034	NDRG4	Layer 2	Layer 5	White matter
ENSG00000186470	BTN3A2	Layer 2	Layer 5	White matter
ENSG00000272345	RP1-30M3.5	Layer 2	Layer 5	White matter
ENSG00000090975	PITPNM2	Layer 2	Layer 5	White matter
ENSG00000189298	ZKSCAN3	Layer 2	Layer 5	White matter
ENSG00000203485	INF2	Layer 2	Layer 5	White matter
ENSG00000204428	LY6G5C	Layer 2	Layer 5	White matter
ENSG00000234745	HLA-B	Layer 2	Layer 5	White matter
ENSG00000204261	PSMB8-AS1	Layer 2	Layer 5
ENSG00000204444	APOM	Layer 2	White matter
ENSG00000010318	PHF7	Layer 2	White matter
ENSG00000010704	HFE	Layer 2	Layer 5
ENSG00000111206	FOXM1	Layer 2	Layer 5
ENSG00000111328	CDK2AP1	Layer 2	Layer 5
ENSG00000124508	BTN2A2	Layer 2	White matter
ENSG00000130783	CCDC62	Layer 2	White matter
ENSG00000137338	PGBD1	Layer 2	White matter
ENSG00000158406	HIST1H4H	Layer 2	White matter
ENSG00000164091	WDR82	Layer 2	White matter
ENSG00000197062	ZSCAN26	Layer 2	Layer 5
ENSG00000204536	CCHCR1	Layer 2	White matter
ENSG00000221890	NPTXR	Layer 2	White matter
ENSG00000230082	PRRT3-AS1	Layer 2	Layer 5
ENSG00000231852	CYP21A2	Layer 2	White matter
ENSG00000090238	YPEL3	Layer 5	White matter
ENSG00000100197	CYP2D6	Layer 5	White matter
ENSG00000101210	EEF1A2	Layer 5	White matter
ENSG00000132821	VSTM2L	Layer 5	White matter
ENSG00000168237	GLYCTK	Layer 5	White matter
ENSG00000026950	BTN3A1	Layer 5	White matter
ENSG00000055147	FAM114A2	Layer 5	White matter
ENSG00000096654	ZNF184	Layer 5	White matter
ENSG00000124613	ZNF391	Layer 5	White matter
ENSG00000166250	CLMP	Layer 5	White matter
ENSG00000176371	ZSCAN2	Layer 5	White matter
ENSG00000196812	ZSCAN16	Layer 5	White matter
ENSG00000204390	HSPA1L	Layer 5	White matter
ENSG00000204463	BAG6	Layer 5	White matter
ENSG00000229891	LINC01315	Layer 5	White matter
ENSG00000231177	LINC00852	Layer 5	White matter
ENSG00000272501	XXbac-BPG299F13.17	Layer 5	White matter
ENSG00000115896	PLCL1	Layer 2
ENSG00000120451	SNX19	Layer 2
ENSG00000164011	ZNF691	Layer 2
ENSG00000166165	CKB	Layer 2
ENSG00000167074	TEF	Layer 2
ENSG00000180573	HIST1H2AC	Layer 2
ENSG00000204305	AGER	Layer 2
ENSG00000204314	PRRT1	Layer 2
ENSG00000204371	EHMT2	Layer 2
ENSG00000213719	CLIC1	Layer 2
ENSG00000272221	XXbac-BPG181B23.7	Layer 2
ENSG00000168477	TNXB	Layer 5
ENSG00000100138	SNU13	Layer 5
ENSG00000114904	NEK4	Layer 5
ENSG00000128274	A4GALT	Layer 5
ENSG00000134070	IRAK2	Layer 5
ENSG00000137343	ATAT1	Layer 5
ENSG00000180423	HARBI1	Layer 5
ENSG00000204227	RING1	Layer 5
ENSG00000204366	ZBTB12	Layer 5
ENSG00000213658	LAT	Layer 5
ENSG00000213760	ATP6V1G2	Layer 5
ENSG00000227507	LTB	Layer 5
ENSG00000269293	ZSCAN16-AS1	Layer 5
ENSG00000081189	MEF2C	White matter
ENSG00000084234	APLP2	White matter
ENSG00000163935	SFMBT1	White matter
ENSG00000197279	ZNF165	White matter
ENSG00000248161	RP11-499E18.1	White matter
ENSG00000010322	NISCH	White matter
ENSG00000022567	SLC45A4	White matter
ENSG00000037749	MFAP3	White matter
ENSG00000094880	CDC23	White matter
ENSG00000103037	SETD6	White matter
ENSG00000111801	BTN3A3	White matter
ENSG00000112343	TRIM38	White matter
ENSG00000123384	LRP1	White matter
ENSG00000124507	PACSIN1	White matter
ENSG00000137185	ZSCAN9	White matter
ENSG00000155980	KIF5A	White matter
ENSG00000163704	PRRT3	White matter
ENSG00000166275	BORCS7	White matter
ENSG00000166278	C2	White matter
ENSG00000177096	FAM109B	White matter
ENSG00000182952	HMGN4	White matter
ENSG00000189134	NKAPL	White matter
ENSG00000198563	DDX39B	White matter
ENSG00000198951	NAGA	White matter
ENSG00000204387	C6orf48	White matter
ENSG00000204410	MSH5	White matter
ENSG00000213533	TMEM110	White matter
ENSG00000228393	LINC01004	White matter
ENSG00000235109	ZSCAN31	White matter
ENSG00000246560	RP11-10L12.4	White matter
ENSG00000276259	RP11-481J2.4	White matter

## Sheet: Data 3 - ASD genes
Supplementary Data 3. Layer-specific differential expression of genes associated with the risk loci of ASD
Gene ID	Gene symbol	Layer with layer-specific expression
ENSG00000028116	VRK2	Layer 2	Layer 5	Layer 6	White Matter
ENSG00000059915	PSD	Layer 2	Layer 5	Layer 6	White Matter
ENSG00000103034	NDRG4	Layer 2	Layer 5	Layer 6	White Matter
ENSG00000272345	RP1-30M3.5	Layer 2	Layer 5	Layer 6	White Matter
ENSG00000189298	ZKSCAN3	Layer 2	Layer 5	Layer 6	White Matter
ENSG00000204428	LY6G5C	Layer 2	Layer 5	Layer 6	White Matter
ENSG00000234745	HLA-B	Layer 2	Layer 5	Layer 6	White Matter
ENSG00000204396	VWA7	Layer 2	Layer 5	White Matter
ENSG00000204421	LY6G6C	Layer 2	Layer 5	White Matter
ENSG00000186470	BTN3A2	Layer 2	Layer 5	White Matter
ENSG00000204261	PSMB8-AS1	Layer 2	Layer 5	Layer 6
ENSG00000204444	APOM	Layer 2	Layer 6	White Matter
ENSG00000010704	HFE	Layer 2	Layer 5	Layer 6
ENSG00000090975	PITPNM2	Layer 2	Layer 5	White Matter
ENSG00000111328	CDK2AP1	Layer 2	Layer 5	Layer 6
ENSG00000137338	PGBD1	Layer 2	Layer 6	White Matter
ENSG00000158406	HIST1H4H	Layer 2	Layer 6	White Matter
ENSG00000203485	INF2	Layer 2	Layer 5	White Matter
ENSG00000204536	CCHCR1	Layer 2	Layer 6	White Matter
ENSG00000090238	YPEL3	Layer 5	Layer 6	White Matter
ENSG00000100197	CYP2D6	Layer 5	Layer 6	White Matter
ENSG00000168237	GLYCTK	Layer 5	Layer 6	White Matter
ENSG00000096654	ZNF184	Layer 5	Layer 6	White Matter
ENSG00000124613	ZNF391	Layer 5	Layer 6	White Matter
ENSG00000166250	CLMP	Layer 5	Layer 6	White Matter
ENSG00000176371	ZSCAN2	Layer 5	Layer 6	White Matter
ENSG00000231177	LINC00852	Layer 5	Layer 6	White Matter
ENSG00000272501	XXbac-BPG299F13.17	Layer 5	Layer 6	White Matter
ENSG00000010318	PHF7	Layer 2	White Matter
ENSG00000111206	FOXM1	Layer 2	Layer 5
ENSG00000124508	BTN2A2	Layer 2	White Matter
ENSG00000130783	CCDC62	Layer 2	White Matter
ENSG00000164091	WDR82	Layer 2	White Matter
ENSG00000166165	CKB	Layer 2	Layer 6
ENSG00000197062	ZSCAN26	Layer 2	Layer 5
ENSG00000204371	EHMT2	Layer 2	Layer 6
ENSG00000221890	NPTXR	Layer 2	White Matter
ENSG00000230082	PRRT3-AS1	Layer 2	Layer 5
ENSG00000231852	CYP21A2	Layer 2	White Matter
ENSG00000101210	EEF1A2	Layer 5	White Matter
ENSG00000132821	VSTM2L	Layer 5	White Matter
ENSG00000026950	BTN3A1	Layer 5	White Matter
ENSG00000055147	FAM114A2	Layer 5	White Matter
ENSG00000134070	IRAK2	Layer 5	Layer 6
ENSG00000137343	ATAT1	Layer 5	Layer 6
ENSG00000180423	HARBI1	Layer 5	Layer 6
ENSG00000196812	ZSCAN16	Layer 5	White Matter
ENSG00000204390	HSPA1L	Layer 5	White Matter
ENSG00000204463	BAG6	Layer 5	White Matter
ENSG00000213658	LAT	Layer 5	Layer 6
ENSG00000229891	LINC01315	Layer 5	White Matter
ENSG00000269293	ZSCAN16-AS1	Layer 5	Layer 6
ENSG00000084234	APLP2	Layer 6	White Matter
ENSG00000166278	C2	Layer 6	White Matter
ENSG00000182952	HMGN4	Layer 6	White Matter
ENSG00000010322	NISCH	Layer 6	White Matter
ENSG00000081189	MEF2C	Layer 6	White Matter
ENSG00000103037	SETD6	Layer 6	White Matter
ENSG00000155980	KIF5A	Layer 6	White Matter
ENSG00000163704	PRRT3	Layer 6	White Matter
ENSG00000197279	ZNF165	Layer 6	White Matter
ENSG00000198951	NAGA	Layer 6	White Matter
ENSG00000204387	C6orf48	Layer 6	White Matter
ENSG00000235109	ZSCAN31	Layer 6	White Matter
ENSG00000115896	PLCL1	Layer 2
ENSG00000120451	SNX19	Layer 2
ENSG00000164011	ZNF691	Layer 2
ENSG00000167074	TEF	Layer 2
ENSG00000180573	HIST1H2AC	Layer 2
ENSG00000204305	AGER	Layer 2
ENSG00000204314	PRRT1	Layer 2
ENSG00000213719	CLIC1	Layer 2
ENSG00000272221	XXbac-BPG181B23.7	Layer 2
ENSG00000168477	TNXB	Layer 5
ENSG00000100138	SNU13	Layer 5
ENSG00000114904	NEK4	Layer 5
ENSG00000128274	A4GALT	Layer 5
ENSG00000204227	RING1	Layer 5
ENSG00000204366	ZBTB12	Layer 5
ENSG00000213760	ATP6V1G2	Layer 5
ENSG00000227507	LTB	Layer 5
ENSG00000174943	KCTD13	Layer 6
ENSG00000008282	SYPL1	Layer 6
ENSG00000135469	COQ10A	Layer 6
ENSG00000154447	SH3RF1	Layer 6
ENSG00000166272	WBP1L	Layer 6
ENSG00000197696	NMB	Layer 6
ENSG00000204287	HLA-DRA	Layer 6
ENSG00000204427	ABHD16A	Layer 6
ENSG00000278828	HIST1H3H	Layer 6
ENSG00000163935	SFMBT1	White Matter
ENSG00000248161	RP11-499E18.1	White Matter
ENSG00000022567	SLC45A4	White Matter
ENSG00000037749	MFAP3	White Matter
ENSG00000094880	CDC23	White Matter
ENSG00000111801	BTN3A3	White Matter
ENSG00000112343	TRIM38	White Matter
ENSG00000123384	LRP1	White Matter
ENSG00000124507	PACSIN1	White Matter
ENSG00000137185	ZSCAN9	White Matter
ENSG00000166275	BORCS7	White Matter
ENSG00000177096	FAM109B	White Matter
ENSG00000189134	NKAPL	White Matter
ENSG00000198563	DDX39B	White Matter
ENSG00000204410	MSH5	White Matter
ENSG00000213533	TMEM110	White Matter
ENSG00000228393	LINC01004	White Matter
ENSG00000246560	RP11-10L12.4	White Matter
ENSG00000276259	RP11-481J2.4	White Matter
